# Supplementary material for: Phosphatidylserine-functionalized liposomes-in-microgels for delivering genistein to effectively treat ulcerative colitis
Source: Royal Society of Chemistry journal article supplement (doi:10.1039/d3tb00812f), 2023-01-01
Supplement: d3tb00812f1.pdf [file d3tb00812f1.pdf]

1           **Phosphatidylserine-functionalized liposomes-in-microgels for delivering**  
2                           **genistein to effectively treat ulcerative colitis**

3                   Huijia Yan, Yanfei Li, Sihui Li, Di Wu, Yu Xu, Jiangning Hu\*

4

5 *Research Group of Nutrition and Health, National Engineering Research Center of*  
6 *Seafood, Dalian Polytechnic University, Dalian 116034, China*

7

8

9 **\* To the Correspondence**

10 Name: Jiang-Ning Hu

11 E-mail: [hujiangning2005@hotmail.com](mailto:hujiangning2005@hotmail.com) (J-N Hu)

12 Mailing address: National Engineering Research Center of Seafood, School of Food

13 Science and Technology, Dalian Polytechnic University, Dalian 116034, China

14 Telephone: +86-411-86318731

15

## 16 **Materials and methods.**

### 17 **Cell culture for *in vitro* anti-inflammation assay**

18 The MTT method was also used to investigate the inhibitory effects of Gen or  
19 Gen@Li NPs on LPS-induced cellular inflammatory responses. RAW 264.7  
20 macrophages were grown in 96-well plates and cultured for 24 hours. The medium was  
21 changed to serum-free medium containing Gen or Gen@Li NPs. After incubation for  
22 24 hours, the media were discarded, and macrophages were exposed to LPS (1  $\mu\text{g}/\text{mL}$ )  
23 for 24 hours. Then, the macrophages were incubated with 100  $\mu\text{L}$  of MTT for 4 hours.  
24 After incubation with MTT, the medium was removed, and 50  $\mu\text{L}$  dimethyl sulfoxide  
25 (DMSO) was added. Finally, the absorbance of each well was measured at 490 nm.  
26 LPS-stimulated macrophages were used for the positive control, and untreated LPS  
27 macrophages were used for the negative control.

### 28 **Determination of inflammatory cytokine content and oxidative stress**

29 RAW 264.7 macrophages were grown in 6-well plates and incubated at 37  $^{\circ}\text{C}$  for 24  
30 hours. Then macrophages were treated with Gen and Gen@Li NPs for 24 hours.  
31 Subsequently, macrophages were treated with LPS (1 $\mu\text{g}/\text{mL}$ ) for 24 hours. The cell  
32 supernatant was gathered and some inflammatory factors containing IL-6, IL-1 $\beta$ , and  
33 TNF- $\alpha$  were measured by ELISA kits.

34 The levels of reactive oxygen species (ROS), superoxide dismutase (SOD), and  
35 glutathione (GSH) in the cell were evaluated by ROS assay kit (E004-1-1, Nanjing  
36 Jiancheng Bioengineering Institute, Nanjing), SOD assay kit (WST-1 method, A001-3-  
37 2, Nanjing Jiancheng Bioengineering Institute, Nanjing), GSH assay kit (A006-2-1,

38 Nanjing Jiancheng Bioengineering Institute, Nanjing).

### 39 **Determination of intracellular ROS level and cell apoptosis**

40 RAW 264.7 macrophages were grown in 6-well plates and incubated at 37 °C for 24  
41 hours. Macrophages were then exposed to Gen or Gen@Li NPs for 24 hours.  
42 Subsequently, macrophages were treated with LPS (1µg/mL). The levels of reactive  
43 oxygen species (ROS) and apoptosis in the cells were evaluated by ROS assay kit  
44 (E004-1-1, Nanjing Jiancheng Bioengineering Institute, Nanjing) and Hoechst 33342  
45 assay kit (C1018, Beyotime Biotechnology, Shanghai).

### 46 **Cellular uptake**

47 RAW 264.7 macrophages were seeded in 6-well plates and cultured for 24 hours.  
48 After exposure to rhodamine b (Rho-B)-Gen or Gen@Li NPs for 2 hours, macrophages  
49 were thoroughly rinsed with PBS and fixed in paraformaldehyde for 20 min. Then, the  
50 nucleus of the cells was stained with DAPI for 10 min. Untreated cells were used as a  
51 negative control. Images were acquired on a fluorescent inverted microscope using the  
52 rhodamine b channel and the DAPI channel. Thereafter, we performed a fluorescence  
53 quantification experiment. Macrophages were seeded in 6-well plates at a density of  
54  $1 \times 10^5$  cells/well. Then, the complete media were replaced with Rho-B-Gen or Gen@Li  
55 NPs contained medium. At time intervals (1, 2 and 4 h), cells were rinsed thoroughly  
56 with PBS and then observed with a fluorescent inverted microscope. Relative  
57 fluorescence quantification was analyzed using Image J software, and the relative  
58 fluorescence intensity was the rhodamine B fluorescence intensity/number of cells.

### 59 **Cytotoxicity of Gen or Gen@Li NPs**

60 The cytotoxicity of Gen or Gen@Li NPs to RAW 264.7 macrophages was  
61 determined. Macrophages were cultured at density of  $10^5$   $\mu$ L/well in 96-well plates in  
62 a 37 °C incubator for 24 h. Then, macrophages were exposed to different concentrations  
63 of Gen and Gen@Li suspensions for 24 hours. Next, macrophages were incubated with  
64 100  $\mu$ L of MTT in a 37 °C incubator for 4 hours. Subsequently, the media were  
65 discarded and 50  $\mu$ L DMSO was added to each well and then measured at 490 nm.

### 66 **Haemolysis analysis**

67 Mouse blood samples were added to NaCl solution and red blood cells (RBCs) were  
68 obtained by centrifugation at 1000 rpm for 5 min. After washing with NaCl solution,  
69 RBCs were diluted with PBS solution (pH 7.4). Samples were divided into the  
70 following groups: (1) Positive control group: purified water; (2) Negative control  
71 group: PBS; (3) Gen group; (4) Gen@Li NPs group and (5) Gen@Li microgels group.  
72 The diluted RBC suspension was mixed uniformly with the above samples, and  
73 incubated at 37 °C for 3 h. After centrifugation at 1000 rpm for 5 min, optical images  
74 were taken and 100  $\mu$ L of each supernatant was added into a 96-well plate. Finally, the  
75 absorbance was measured at 540 nm.

76

77 **Figures captions:**

78 **Figure S1.** EDS of Gen@Li NPs (i), Alg microgels (ii) and Gen@Li microgels (iii).

79 Sample sizes are three (n=3).

80 **Figure S2.** Determination of anti-inflammatory activities and oxidative stress level *in*

81 *vitro*. Changes of (A) IL-1 $\beta$ , (B) IL-6, (C) TNF- $\alpha$  levels in RAW264.7 cells treated with

82 Gen and Gen@Li NPs. Determination of (E) NO, (F) SOD and (G) GSH. Data were

83 expressed as mean  $\pm$  SD. Sample sizes are three (n=3).

84 **Figure S3.** Biocompatibility. (A) Cytotoxicity of Gen or Gen@Li NPs to RAW264.7

85 cells. (B) Hemolysis analysis. Data were expressed as mean  $\pm$  SD. Sample sizes are

86 three (n=3).

87 **Figure S4.** Intestinal permeability indicated by serum FITC-Dextran concentration.

88 Data were expressed as mean  $\pm$  SD. \*P<0.05, \*\*P<0.01, \*\*\*P<0.001, \*\*\*\*P<0.0001.

89 Sample sizes are three (n=3).

90 **Table S1.** Characteristics of Li NPs and Gen@Li NPs. The values are mean  $\pm$  SD (n=3).

91

92 **Figure S1**

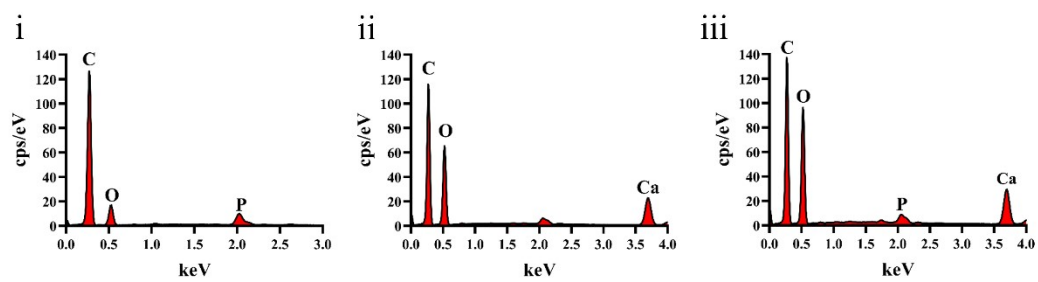

93

94 Figure S2

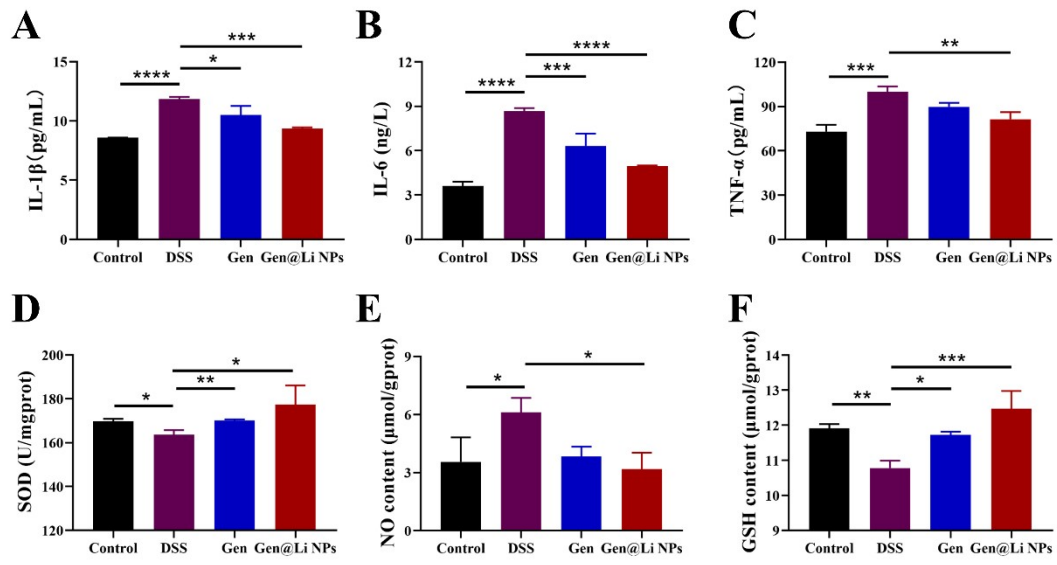

95

96 Figure S3

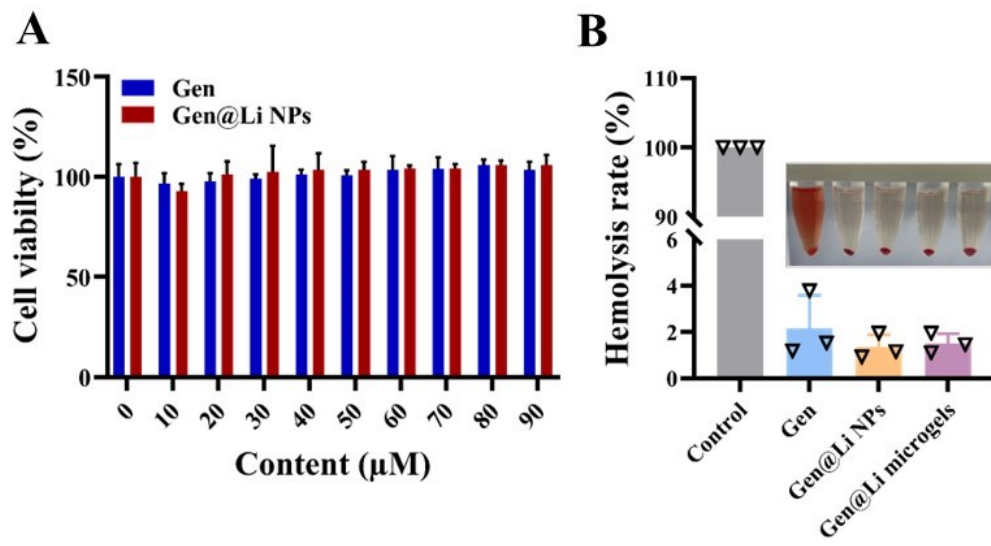

97

98



99 Figure S4

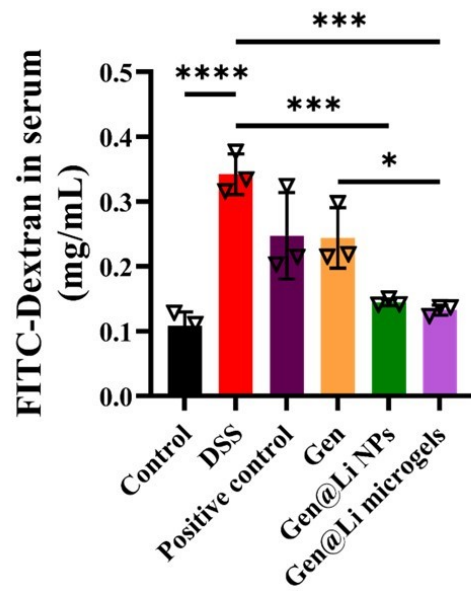

101 **Table S1**

|            | Particle Size | PDI         | Zeta-potential(mv) |
|------------|---------------|-------------|--------------------|
| Li NPs     | 159.80±1.56   | 0.32±0.0087 | -16.33±1.16        |
| Gen@Li NPs | 245.90±9.61   | 0.32±0.06   | -28.10±1.93        |

102
